# Supplementary material for: Inflammation Status and Body Composition Predict Two-Year Mortality of Patients with Locally Advanced Head and Neck Squamous Cell Carcinoma under Provision of Recommended Energy Intake during Concurrent Chemoradiotherapy
Source: MDPI journal article supplement (doi:10.3390/biomedicines10020388), 2022-02-06
Supplement: s1 [file s1]

## Supplementary Tables

**Table S1.** Correlation between pretreatment NIBs and body composition components using DXA before treatment in 123 patients with LAHNSCC undergoing CCRT

| Pretreatment NIBs | Hb      | WBC     | PLT     | TLC     | Alb     | CRP    | NLR     | PLR     | PNI    | LBM     | TFM |
|-------------------|---------|---------|---------|---------|---------|--------|---------|---------|--------|---------|-----|
| Hb                | ---     |         |         |         |         |        |         |         |        |         |     |
| WBC               | 0.344   | ---     |         |         |         |        |         |         |        |         |     |
| PLT               | 0.585   | <0.001* | ---     |         |         |        |         |         |        |         |     |
| TLC               | 0.026*  | <0.001* | 0.704   | ---     |         |        |         |         |        |         |     |
| Alb               | <0.001* | 0.743   | 0.660   | 0.115   | ---     |        |         |         |        |         |     |
| CRP               | 0.141   | 0.089   | 0.125   | 0.329   | 0.336   | ---    |         |         |        |         |     |
| NLR               | 0.007*  | 0.001*  | 0.054   | <0.001* | 0.048*  | 0.311  | ---     |         |        |         |     |
| PLR               | 0.039*  | 0.014*  | <0.001* | <0.001* | 0.222   | 0.555  | <0.001* | ---     |        |         |     |
| PNI               | 0.001*  | 0.001*  | 0.385   | <0.001* | <0.001* | 0.698  | <0.001* | <0.001* | ---    |         |     |
| LBM               | 0.074   | 0.744   | 0.145   | 0.013*  | 0.003*  | 0.029* | 0.055   | 0.011*  | 0.001* | ---     |     |
| TFM               | 0.098   | 0.650   | 0.520   | 0.001*  | 0.088   | 0.599  | 0.035*  | 0.003*  | 0.001* | <0.001* | --- |

\*  $P < 0.05$ , represents statistical significance.

Abbreviations: LAHNSCC, locally advanced head and neck squamous cell carcinoma; CCRT, concurrent chemoradiotherapy; NIBs, nutritional-inflammatory biomarkers; Hb, hemoglobin, g/dL; WBC, white blood cell,  $10^3$  cells/mm<sup>3</sup>; PLT, platelet,  $10^3$ /mm<sup>3</sup>; TLC, total lymphocyte count,  $10^3$  cells/mm<sup>3</sup>; Alb, albumin, g/dL; CRP, C-reactive protein, mg/dL; NLR, neutrophil-to-lymphocyte ratio; PLR, platelet-to-lymphocyte ratio; PNI, prognostic nutritional index; LBM, lean body mass, kg; TFM, total fat mass, kg; DXA, dual-energy X-ray absorptiometry.

**Table S2.** Association among OCC Factor 3, NOCC Factor 2, clinicopathological factors, treatment-related factors, nutritional/inflammatory markers, and body composition parameters assessed using DXA before CCRT in 123 patients with LAHNSCC

| Number                                           | OCC Factor 3                   | NOCC Factor 2                     |           |                            |          |
|--------------------------------------------------|--------------------------------|-----------------------------------|-----------|----------------------------|----------|
|                                                  | Oral cavity with adjuvant CCRT | Non-oral cavity with primary CCRT |           |                            |          |
|                                                  | 69                             | 58                                |           |                            |          |
|                                                  | ≤ 0.049 vs. > 0.049            | ≤ 0.3 vs. > 0.3                   |           |                            |          |
| Expressed as number or mean ± standard deviation |                                |                                   |           |                            |          |
| Number (n)                                       | -                              | 36 vs. 33                         | 34 vs. 20 |                            |          |
| Biological factors                               |                                |                                   | P-value*  | P-value*                   |          |
| Age (years)                                      |                                | 50.2 ± 7.8 vs. 56.9 ± 7.5         | 0.002*    | 54.7 ± 8.8 vs. 56.1 ± 8.1  | 0.623    |
| Sex (male vs. female)                            |                                | 36 : 0 vs. 32 : 1                 | 0.293     | 33: 1 vs. 18 : 2           | 0.274    |
| TNM stage (III vs. IVA vs. IVB)                  |                                | 4 : 25 : 7 vs. 0 : 25 : 8         | 0.139     | 2: 21 : 11 vs. 3 : 14 :3   | 0.256    |
| T status (T1-2 vs. T3-4)                         |                                | 4 : 32 vs. 4 : 29                 | 0.896     | 9 : 25 vs. 11 : 9          | 0.049*   |
| N status (N0-1 vs. N2-3)                         |                                | 17 : 19 vs. 13 : 20               | 0.512     | 8 : 26 vs. 3 : 17          | 0.452    |
| Histological grade (well vs. MD vs. PD)          |                                | 3 : 27 :6 vs. 5 : 24 : 4          | 0.623     | 2 : 19 :13 vs. 0 : 15 : 5  | 0.277    |
| Smoking (no vs. yes)                             |                                | 3 : 33 vs. 3 : 30                 | 0.910     | 1 : 33 vs. 4 : 16          | 0.052    |
| Alcohol (no vs. yes)                             |                                | 10 : 26 vs. 8 :25                 | 0.738     | 9 : 25 vs. 4 :16           | 0.591    |
| Betel nut (no vs. yes)                           |                                | 10 : 26 vs. 6 : 27                | 0.345     | 17 : 17 vs. 10 : 10        | 1.000    |
| ECOG performance status (0 : 1 : 2)              |                                | 2 : 30 : 4 vs. 0 : 31 : 2         | 0.278     | 1 : 32 : 1 vs. 5 : 15 : 0  | 0.036*   |
| ECOG performance status (0 vs. ≥ 1)              |                                | 17 : 19 vs. 12 : 21               | 0.254     | 15 : 19 vs. 7 : 13         | 0.510    |
| Tracheostomy (no vs. yes)                        |                                | 11 : 25 vs. 12 : 21               | 0.609     | 29 : 5 vs. 19 : 1          | 0.049*   |
| PG-SGA (A vs. B vs. C)                           |                                | 6 : 20 : 10 vs. 7 : 18 : 8        | 0.872     | 5 : 18 : 11 vs. 0 : 15 : 5 | 0.124    |
| Anthropometric data and blood NIB data           |                                |                                   |           |                            |          |
| Before CCRT                                      |                                |                                   |           |                            |          |
| BMI (kg/m²)                                      |                                | 22.7 ± 4.2 vs. 22.8 ± 4.4         | 0.922     | 21.1 ± 3.7 vs. 25.5 ± 3.0  | < 0.001* |
| Weight (kg)                                      |                                | 63.5 ± 12.0 vs. 63.9 ± 13.4       | 0.127     | 57.9 ± 11.4 vs. 69.5 ± 9.7 | < 0.001* |

|                                               |                                        |          |                                      |        |
|-----------------------------------------------|----------------------------------------|----------|--------------------------------------|--------|
| Hb (g/dL)                                     | 11.9 ± 1.5 <i>vs.</i> 11.4 ± 1.3       | 0.102    | 11.2 ± 1.6 <i>vs.</i> 13.4 ± 1.9     | 0.031* |
| WBC (×10 <sup>3</sup> cells/mm <sup>3</sup> ) | 7.4 ± 2.6 <i>vs.</i> 7.1 ± 2.5         | 0.658    | 7.3 ± 3.3 <i>vs.</i> 6.8 ± 2.3       | 0.573  |
| Platelet (×10 <sup>3</sup> /mm <sup>3</sup> ) | 308.2 ± 129.5 <i>vs.</i> 377.0 ± 160.9 | 0.064    | 248.5 ± 70.9 <i>vs.</i> 256.3 ± 80.9 | 0.718  |
| TLC (×10 <sup>3</sup> cells/mm <sup>3</sup> ) | 1.7 ± 0.6 <i>vs.</i> 1.6 ± 0.6         | 0.632    | 1.5 ± 0.4 <i>vs.</i> 2.0 ± 0.6       | 0.046* |
| Albumin (g/dL)                                | 3.6 ± 0.7 <i>vs.</i> 3.7 ± 0.4         | 0.478    | 3.6 ± 0.3 <i>vs.</i> 3.9 ± 0.5       | 0.022* |
| CRP (mg/dL)                                   | 8.5 ± 11.6 <i>vs.</i> 14.2 ± 16.8      | 0.120    | 21.5 ± 9.8 <i>vs.</i> 13.2 ± 10.1    | 0.549  |
| NLR                                           | 4.2 ± 5.4 <i>vs.</i> 3.2 ± 1.9         | 0.361    | 3.2 ± 3.5 <i>vs.</i> 2.5 ± 1.1       | 0.463  |
| PLR                                           | 202.1 ± 29.2 <i>vs.</i> 243.9 ± 28.6   | 0.312    | 152.9 ± 20.7 <i>vs.</i> 218.3 ± 10.9 | 0.022* |
| PNI                                           | 47.9 ± 6.3 <i>vs.</i> 45.6 ± 5.8       | 0.103    | 44.6 ± 5.5 <i>vs.</i> 48.5 ± 5.3     | 0.031* |
| <b>Treatment-interval change (%)</b>          |                                        |          |                                      |        |
| ΔBMI%**                                       | -7.6 ± 0.8 <i>vs.</i> 0.34 ± 1.1       | < 0.001* | -3.2 ± 7.3 <i>vs.</i> -9.2 ± 8.5     | 0.008* |
| ΔBW%**                                        | -7.8 ± 0.8 <i>vs.</i> -0.2 ± 0.8       | < 0.001* | -3.2 ± 7.2 <i>vs.</i> - 8.5 ± 8.6    | 0.020* |
| ΔHb%**                                        | -8.5 ± 2.6 <i>vs.</i> -7.8 ± 2.4       | 0.884    | -8.5 ± 2.5 <i>vs.</i> -18.5 ± 2.6    | 0.023* |
| ΔWBC%**                                       | -17.7 ± 8.8 <i>vs.</i> -25.9 ± 5.2     | 0.436    | -23.8 ± 8. <i>vs.</i> -24.2. ± 8.    | 0.97   |
| ΔPlatelet%**                                  | -14.4 ± 5.6 <i>vs.</i> -27.1 ± 4.5     | 0.079    | -14.8 ± 5. <i>vs.</i> -12.5 ± 10.8   | 0.860  |
| ΔTLC%**                                       | -38.9 ± 9.8 <i>vs.</i> -39.4 ± 6.2     | 0.964    | -56.1 ± 31 <i>vs.</i> -45.1 ± 39.3   | 0.276  |
| ΔAlbumin%**                                   | 8.3 ± 5.0 <i>vs.</i> 4.9 ± 3.0         | 0.571    | 5.6 ± 3.7 <i>vs.</i> 0.2 ± 2.5       | 0.011* |
| ΔCRP%**                                       | 91.6 ± 11.5 <i>vs.</i> 75.6 ± 28.7     | 0.587    | 48.3 ± 12.8 <i>vs.</i> 47.7 ± 31.7   | 0.549  |
| ΔNLR%**                                       | 2.6 ± 6.0 <i>vs.</i> 7.8 ± 21.1        | 0.287    | 7.4 ± 2.5 <i>vs.</i> 4.8 ± 1.6       | 0.441  |
| ΔPLR%**                                       | 202.1 ± 29.3 <i>vs.</i> 223.9 ± 28.6   | 0.339    | 276.3 ± 99.6 <i>vs.</i> 220.5 ± 45.8 | 0.239  |
| ΔPNI%**                                       | -7.1 ± 2.3 <i>vs.</i> -2.7 ± 3.1       | 0.271    | -11.2 ± 12.1 <i>vs.</i> -8.5 ± 14.1  | 0.457  |

#### DXA-related measurements

##### Before CCRT

|          |                                  |       |                                  |          |
|----------|----------------------------------|-------|----------------------------------|----------|
| LBM (kg) | 43.9 ± 5.3 <i>vs.</i> 43.7 ± 5.1 | 0.889 | 42.7 ± 1.3 <i>vs.</i> 45.0 ± 1.9 | 0.025*   |
| TFM (kg) | 16.8 ± 8.0 <i>vs.</i> 17.4 ± 9.7 | 0.745 | 12.7 ± 7.4 <i>vs.</i> 21.6 ± 4.1 | < 0.001* |
| ASM (kg) | 18.7 ± 3.1 <i>vs.</i> 18.1 ± 3.0 | 0.472 | 17.6 ± 4.1 <i>vs.</i> 19.5 ± 2.3 | 0.031*   |

|                                                                 |                                     |          |                                      |          |
|-----------------------------------------------------------------|-------------------------------------|----------|--------------------------------------|----------|
| Android (%)                                                     | 29.2 ± 13.0 <i>vs.</i> 30.2 ± 13.9  | 0.716    | 24.4 ± 8.4 <i>vs.</i> 40.0 ± 4.9     | < 0.001* |
| Gynoid (%)                                                      | 25.4 ± 7.7 <i>vs.</i> 26.0 ± 9.0    | 0.774    | 21.6 ± 4.3 <i>vs.</i> 30.5 ± 4.4     | < 0.001* |
| <b>Treatment-interval change (%)</b>                            |                                     |          |                                      |          |
| ΔLBM%**                                                         | -9.8 ± 2.0 <i>vs.</i> -2.0 ± 4.1    | < 0.001* | -4.8 ± 7.2 <i>vs.</i> -6.8 ± 5.8     | 0.302    |
| ΔTFM%**                                                         | -6.8 ± 3.0 <i>vs.</i> 2.0 ± 2.3     | 0.012*   | -3.3 ± 23.7 <i>vs.</i> -10.2 ± 11.5  | 0.001*   |
| ΔASM%**                                                         | -13.7 ± 3.6 <i>vs.</i> -2.5 ± 5.9   | < 0.001* | -7.8 ± 10.9 <i>vs.</i> -8.5 ± 7.8    | 0.238    |
| ΔAndroid%**                                                     | -1.6 ± 4.2 <i>vs.</i> -2.4 ± 2.8    | 0.438    | 0.9 ± 35.1 <i>vs.</i> -7.9 ± 12.4    | 0.213    |
| ΔGynoid%**                                                      | 1.1 ± 0.5 <i>vs.</i> 1.0 ± 0.4      | 0.939    | 4.83 ± 27.2 <i>vs.</i> 0.6 ± 111.7   | 0.467    |
| <b>Mean daily calorie intake during CCRT (kcal/kg/day)</b>      | 26.7 ± 7.8 <i>vs.</i> 30.7 ± 9.1    | 0.039*   | 29.5 ± 9.6 <i>vs.</i> 25.4 ± 4.0     | 0.022*   |
| < 30 : ≥ 30                                                     | 27 : 9 <i>vs.</i> 21 : 11           | 0.301    | 24 : 10 <i>vs.</i> 19 : 1            | 0.031*   |
| <b>Mean daily protein intake during CCRT (g/kg/day, median)</b> | 1.0 ± 0.8 <i>vs.</i> 1.1 ± 1.8      | 0.441    | 1.2 ± 1.1 <i>vs.</i> 0.8 ± 1.9       | 0.322    |
| <b>Feeding tube placement (%)</b>                               | 58.3 : 78.8                         | 0.069    | 66.9 : 28.4                          | 0.001*   |
| <b>Mean days of feeding tube placement during CCRT (median)</b> | 27.3 ± 4.8 <i>vs.</i> 42.4 ± 5.0    | 0.033*   | 26.0 ± 4.8 <i>vs.</i> 15.3 ± 5.2     | 0.011*   |
| <i>Treatment-associated factors</i>                             |                                     |          |                                      |          |
| <b>CCRT Regimen</b>                                             |                                     |          |                                      |          |
| RT dose (Gy)                                                    | 64.1 ± 3.6 <i>vs.</i> 64.6 ± 4.1    | 0.571    | 69.8 ± 3.5 <i>vs.</i> 69.7 ± 2.6     | 0.862    |
| RT fractions                                                    | 31.8 ± 1.4 <i>vs.</i> 32.2 ± 1.8    | 0.256    | 33.6 ± 1.7 <i>vs.</i> 33.3 ± 0.9     | 0.463    |
| RT duration (days)                                              | 47.8 ± 5.7 <i>vs.</i> 48.5 ± 4.0    | 0.660    | 52.3 ± 9.6 <i>vs.</i> 50.5 ± 4.3     | 0.417    |
| Cisplatin dose (mg/m <sup>2</sup> )                             | 237.2 ± 15.3 <i>vs.</i> 239.8 ± 4.4 | 0.599    | 213.8 ± 10.8 <i>vs.</i> 212.3 ± 16.1 | 0.934    |
| <b>CCRT-induced grade 3/4 toxicity</b>                          |                                     |          |                                      |          |
| Dermatitis (no <i>vs.</i> yes)                                  | 35 : 1 <i>vs.</i> 31 : 2            | 0.504    | 33 : 1 <i>vs.</i> 19 : 1             | 0.699    |
| Pharyngitis (no <i>vs.</i> yes)                                 | 34 : 2 <i>vs.</i> 31 : 2            | 0.719    | 26 : 8 <i>vs.</i> 18 : 2             | 0.216    |
| Infection (no <i>vs.</i> yes)                                   | 34 : 2 <i>vs.</i> 27 : 6            | 0.405    | 22 : 12 <i>vs.</i> 15 : 5            | 0.432    |

|                                      |                           |        |                           |        |
|--------------------------------------|---------------------------|--------|---------------------------|--------|
| Mucositis (no <i>vs.</i> yes)        | 26 : 10 <i>vs.</i> 25 : 8 | 0.507  | 25 : 9 <i>vs.</i> 15 : 5  | 0.909  |
| Emesis (no <i>vs.</i> yes)           | 32 : 4 <i>vs.</i> 31 : 2  | 0.457  | 31 : 3 <i>vs.</i> 19 : 1  | 0.601  |
| Anemia (no <i>vs.</i> yes)           | 33 : 3 <i>vs.</i> 31 : 2  | 0.716  | 30 : 4 <i>vs.</i> 17 : 3  | 0.733  |
| Neutropenia (no <i>vs.</i> yes)      | 22 : 14 <i>vs.</i> 24 : 9 | 0.307  | 22 : 12 <i>vs.</i> 11 : 9 | 0.480  |
| Thrombocytopenia (no <i>vs.</i> yes) | 33 : 3 <i>vs.</i> 31 : 2  | 0.716  | 29 : 5 <i>vs.</i> 18 : 2  | 0.619  |
| <b>2-year mortality rate (%)</b>     | 30.6 <i>vs.</i> 57.6      | 0.024* | 41.2 <i>vs.</i> 10.5      | 0.015* |

\*The *P*-value was determined using the Chi-square test (for sex, TNM stage, T status, N status, histological grade, ECOG performance status, HN-CCI, PG-SGA smoking, alcohol, betel nut, tracheostomy, percentage of feeding tube placement, mean daily calorie during CCRT  $\geq$  30 kcal/kg/day, and all CCRT-induced grade 3/4 toxicities), independent *t*-test (age, RT dose, RT fraction, RT days, cisplatin dose, BMI, BW, Hb, WBC, platelet, TLC, albumin, CRP, NLR, PLR, PNI, and 2-year mortality rate), or Mann–Whitney tests (mean daily calorie intake, mean daily protein intake, mean days of feeding tube placement, all DXA-related parameters, and all treatment-interval changes in anthropometric data and blood NIB data). Statistical significance was set at  $P < 0.05$ .

\*\* $\Delta$  indicates a value obtained by subtracting the pretreatment value from the post-treatment value. % indicates ( $\Delta$  value/ the pretreatment value)  $\times 100\%$

Abbreviations: LAHNSCC, locally advanced head and neck squamous cell carcinoma; OCC, oral cavity cancer; NOCC, non-oral cavity cancer; CCRT, concurrent chemoradiotherapy; SD, standard deviation; MD, moderately differentiated; PD, poorly differentiated; HN-CCI, Charlson comorbidity index; ECOG, Eastern Cooperative Oncology Group; PG-SGA, Patient-Generated Subjective Global Assessment; BW, body weight; BMI, body mass index; Hb, hemoglobin; WBC, white blood cell; TLC, total lymphocyte count; CRP, C-reactive protein; NLR, neutrophil-to-lymphocyte ratio; PLR, platelet-to-lymphocyte ratio; PNI, prognostic nutritional index; DXA, dual-energy X-ray absorptiometry; LBM, lean body mass; TFM, total fat mass; ASM, appendicular skeletal mass.

**Table S3.** Association among ECOG performance status, age, clinicopathological factors, treatment-related factors, nutritional/inflammatory markers, and body composition parameters before CCRT in 123 patients with LAHNSCC, as assessed using DXA

|                                                           | ECOG performance status               |                  | Age                                      |                  |
|-----------------------------------------------------------|---------------------------------------|------------------|------------------------------------------|------------------|
|                                                           | Oral cavity cancer with adjuvant CCRT |                  | Non-oral cavity cancer with primary CCRT |                  |
| Included patient number                                   | 69                                    |                  | 54                                       |                  |
|                                                           | < 2 <i>vs.</i> = 2                    |                  | ≤ 52.5 <i>vs.</i> > 52.5                 |                  |
| Variables, expressed as number or mean±standard deviation |                                       |                  |                                          |                  |
| Patient number (n)                                        | 63 <i>vs.</i> 6                       |                  | 21 <i>vs.</i> 33                         |                  |
| <i>Clinicopathological factors</i>                        |                                       | <i>P</i> -value* |                                          | <i>P</i> -value* |
| Age (years)                                               | 53.2 ± 1.0 <i>vs.</i> 53.8 ± 4.3      |                  | 47.8 ± 7.4 <i>vs.</i> 60.1 ± 5.0         |                  |
| Sex (male <i>vs.</i> female)                              | 62 : 1 <i>vs.</i> 6 : 0               |                  | 20 : 1 <i>vs.</i> 31 : 2                 |                  |
| TNM stage (III <i>vs.</i> IVA <i>vs.</i> IVB)             | 4 : 14 : 15 <i>vs.</i> 0 : 6 : 0      |                  | 3 : 14 : 4 <i>vs.</i> 2 : 21 : 10        |                  |
| T status (T1-2 <i>vs.</i> T3-4)                           | 8 : 55 <i>vs.</i> 0 : 6               |                  | 6 : 15 <i>vs.</i> 14 : 19                |                  |
| N status (N0-1 <i>vs.</i> N2-3)                           | 25 : 38 <i>vs.</i> 5 : 1              |                  | 4 : 17 <i>vs.</i> 7 : 26                 |                  |
| Histological grade (well <i>vs.</i> MD <i>vs.</i> PD)     | 7 : 47 :9 <i>vs.</i> 1 : 4 : 1        |                  | 0 : 13 :8 <i>vs.</i> 2 : 21 : 10         |                  |
| Smoking (no <i>vs.</i> yes)                               | 5 : 58 <i>vs.</i> 1 : 5               |                  | 3 : 18 <i>vs.</i> 2 : 31                 |                  |
| Alcohol (no <i>vs.</i> yes)                               | 16 : 47 <i>vs.</i> 2 :4               |                  | 4 : 17 <i>vs.</i> 9 :24                  |                  |
| Betel nut (no <i>vs.</i> yes)                             | 14 : 49 <i>vs.</i> 2 : 4              |                  | 9 : 12 <i>vs.</i> 18 : 15                |                  |
| ECOG performance status (0 : 1 : 2)                       | 2 : 61 : 0 <i>vs.</i> 0 : 0 : 6       |                  | 2 : 19 : 0 <i>vs.</i> 4 : 28 : 1         |                  |
| HN-CCI (0 <i>vs.</i> ≥ 1)                                 | 27 : 36 <i>vs.</i> 3 : 3              |                  | 12 : 9 <i>vs.</i> 13 : 23                |                  |
| Tracheostomy (no <i>vs.</i> yes)                          | 23 : 40 <i>vs.</i> 0 : 6              |                  | 16 : 5 <i>vs.</i> 28 : 5                 |                  |
| PG-SGA (A <i>vs.</i> B <i>vs.</i> C)                      | 12 : 34 : 17 <i>vs.</i> 1 : 4 : 1     |                  | 1 : 15 : 5 <i>vs.</i> 4 : 18 : 11        |                  |
| <i>Anthropometric data and blood NIB data</i>             |                                       |                  |                                          |                  |
| <b>Before CCRT</b>                                        |                                       |                  |                                          |                  |
| BMI (kg/m²)                                               | 22.9 ± 4.4 <i>vs.</i> 20.9 ± 4.1      |                  | 23.3 ± 4.4 <i>vs.</i> 22.3 ± 3.8         |                  |
| BW (kg)                                                   | 63.9 ± 3.4 <i>vs.</i> 60.1 ± 2.6      |                  | 66.0 ± 9.3 <i>vs.</i> 59.3 ± 5.8         |                  |

|                                               |                                      |        |                                        |        |
|-----------------------------------------------|--------------------------------------|--------|----------------------------------------|--------|
| Hb (g/dL)                                     | 11.7 ± 1.4 <i>vs.</i> 11.7 ± 1.2     | 0.923  | 12.4 ± 1.4 <i>vs.</i> 11.7 ± 1.8       | 0.139  |
| WBC (×10 <sup>3</sup> cells/mm <sup>3</sup> ) | 7.0 ± 2.3 <i>vs.</i> 9.6 ± 3.8       | 0.163  | 7.4 ± 3.8 <i>vs.</i> 6.9 ± 2.4         | 0.534  |
| Platelet (×10 <sup>3</sup> /mm <sup>3</sup> ) | 330.1 ± 17.9 <i>vs.</i> 457.0 ± 71.6 | 0.044* | 247.5 ± 69.5 <i>vs.</i> 253.5 ± 79.8   | 0.766  |
| TLC (×10 <sup>3</sup> cells/mm <sup>3</sup> ) | 1.6 ± 0.6 <i>vs.</i> 1.8 ± 0.9       | 0.540  | 1.9 ± 0.7 <i>vs.</i> 1.7 ± 0.6         | 0.256  |
| Albumin (g/dL)                                | 3.8 ± 0.5 <i>vs.</i> 3.5 ± 0.4       | 0.028* | 4.0 ± 0.6 <i>vs.</i> 3.6 ± 0.5         | 0.024* |
| CRP (mg/dL)                                   | 9.9 ± 13.3 <i>vs.</i> 24.8 ± 27.0    | 0.239  | 29.5 ± 70.4 <i>vs.</i> 15.3 ± 75.8     | 0.213  |
| NLR                                           | 3.2 ± 6.6 <i>vs.</i> 20.9 ± 10.9     | 0.031* | 2.4 ± 0.6 <i>vs.</i> 3.3 ± 0.5         | 0.022* |
| PLR                                           | 210.2 ± 19.4 <i>vs.</i> 347.2 ± 11.5 | 0.011* | 141.2 ± 50.8 <i>vs.</i> 148.8 ± 1218.0 | 0.784  |
| PNI                                           | 46.7 ± 6.1 <i>vs.</i> 47.8 ± 7.2     | 0.667  | 50.6 ± 4.1 <i>vs.</i> 46.8 ± 5.6       | 0.009* |
| <b>Treatment-interval change (%)</b>          |                                      |        |                                        |        |
| ΔBMI%**                                       | -4.1 ± 6.6 <i>vs.</i> -2.2 ± 6.1     | 0.134  | -4.9 ± 10.2 <i>vs.</i> -5.7 ± 6.8      | 0.737  |
| ΔBW%**                                        | -4.5 ± 6.8 <i>vs.</i> -4.0 ± 5.4     | 0.444  | -5.0 ± 9.8 <i>vs.</i> -5.5 ± 6.4       | 0.830  |
| ΔHb%**                                        | -7.9 ± 1.8 <i>vs.</i> -10.7 ± 4.9    | 0.651  | -11.7 ± 11.1 <i>vs.</i> -11.8 ± 15.5   | 0.966  |
| ΔWBC%**                                       | -17.7 ± 8.8 <i>vs.</i> -25.9 ± 5.2   | 0.436  | -26.8 ± 33.9 <i>vs.</i> -22.2 ± 49.0   | 0.714  |
| ΔPlatelet%**                                  | -18.4 ± 30.4 <i>vs.</i> -44.7 ± 22.1 | 0.075  | -10.5 ± 40.8 <i>vs.</i> -16.1 ± 38.0   | 0.618  |
| ΔTLC%**                                       | -37.2 ± 50.7 <i>vs.</i> -59.9 ± 19.2 | 0.281  | -56.3 ± 34.2 <i>vs.</i> -49.5 ± 35.3   | 0.495  |
| ΔAlbumin%**                                   | 5.1 ± 3.3 <i>vs.</i> 3.7 ± 5.0       | 0.491  | 6.4 ± 22.2 <i>vs.</i> 2.9 ± 15.9       | 0.632  |
| ΔCRP%**                                       | 72.4 ± 41.5 <i>vs.</i> 83.1 ± 27.3   | 0.389  | 57.4 ± 34.1 <i>vs.</i> 66.0 ± 69.3     | 0.221  |
| ΔNLR%**                                       | 3.2 ± 6.6 <i>vs.</i> 20.9 ± 43.2     | 0.287  | 9.2 ± 18.2 <i>vs.</i> 4.6 ± 6.5        | 0.280  |
| ΔPLR%**                                       | 111.1 ± 25.7 <i>vs.</i> 99.4 ± 240.1 | 0.543  | 335.1 ± 71.8 <i>vs.</i> 194.2 ± 194.6  | 0.145  |
| ΔPNI%**                                       | -4.4 ± 16.1 <i>vs.</i> -8.7 ± 9.5    | 0.260  | -9.7 ± 12.1 <i>vs.</i> -10.6 ± 13.5    | 0.787  |

---

**DXA-related measurements**


---

|                    |                                  |        |                                  |        |
|--------------------|----------------------------------|--------|----------------------------------|--------|
| <b>Before CCRT</b> |                                  |        |                                  |        |
| LBM (kg)           | 44.2 ± 5.1 <i>vs.</i> 38.9 ± 2.8 | 0.015* | 46.0 ± 7.1 <i>vs.</i> 42.0 ± 6.3 | 0.034* |
| TFM (kg)           | 16.8 ± 9.1 <i>vs.</i> 19.1 ± 6.0 | 0.125  | 17.0 ± 6.6 <i>vs.</i> 15.3 ± 5.7 | 0.231  |
| ASM (kg)           | 18.8 ± 3.0 <i>vs.</i> 15.3 ± 1.7 | 0.007* | 20.2 ± 3.9 <i>vs.</i> 17.7 ± 3.4 | 0.017* |

|                                                                 |                                      |        |                                      |        |
|-----------------------------------------------------------------|--------------------------------------|--------|--------------------------------------|--------|
| Android (%)                                                     | 28.8 ± 13.5 <i>vs.</i> 37.5 ± 9.5    | 0.131  | 30.8 ± 10.6 <i>vs.</i> 29.7 ± 10.5   | 0.721  |
| Gynoid (%)                                                      | 25.4 ± 8.2 <i>vs.</i> 27.7 ± 7.8     | 0.224  | 24.6 ± 6.4 <i>vs.</i> 25.1 ± 5.9     | 0.787  |
| <b>Treatment-interval change (%)</b>                            |                                      |        |                                      |        |
| ΔLBM%**                                                         | -6.2 ± 5.7 <i>vs.</i> -4.8 ± 5.0     | 0.599  | -5.1 ± 7.2 <i>vs.</i> -5.9 ± 6.5     | 0.700  |
| ΔTFM%**                                                         | -3.0 ± 14.7 <i>vs.</i> 1.8 ± 9.7     | 0.499  | -2.1 ± 4.2 <i>vs.</i> -1.9 ± 2.6     | 0.238  |
| ΔASM%**                                                         | -7.3 ± 7.2 <i>vs.</i> -13.9 ± 10.3   | 0.041* | -5.8 ± 9.1 <i>vs.</i> -9.4 ± 10.0    | 0.197  |
| ΔAndroid%**                                                     | 0.4 ± 22.3 <i>vs.</i> 0.5 ± 10.8     | 0.224  | 3.4 ± 7.9 <i>vs.</i> -2.9 ± 24.6     | 0.262  |
| ΔGynoid%**                                                      | 3.5 ± 11.1 <i>vs.</i> 13.0 ± 11.9    | 0.219  | 7.9 ± 3.0 <i>vs.</i> 1.1 ± 15.7      | 0.175  |
| <hr/>                                                           |                                      |        |                                      |        |
| <b>Mean daily calorie intake during CCRT (kcal/kg/day)</b>      | 28.3 ± 8.5 <i>vs.</i> 31.9 ± 9.9     | 0.334  | 25.2 ± 8.1 <i>vs.</i> 25.8 ± 7.0     | 0.756  |
| < 30 : ≥ 30                                                     | 45 : 18 <i>vs.</i> 3 : 3             | 0.276  | 16 : 5 <i>vs.</i> 27 : 6             | 0.617  |
| <b>Mean daily protein intake during CCRT (g/kg/day, median)</b> | 1.1 ± 0.8 <i>vs.</i> 1.1 ± 1.8       | 0.742  | 1.1 ± 1.1 <i>vs.</i> 1.1 ± 1.2       | 0.802  |
| <b>Feeding tube placement (no <i>vs.</i> yes)</b>               | 21 : 42 : 1 : 5                      | 0.403  | 11 : 10 <i>vs.</i> 15 : 18           | 0.6193 |
| <b>Mean days of feeding tube placement during CCRT (median)</b> | 32.4 ± 3.6 <i>vs.</i> 56.5 ± 11.4    | 0.035* | 18.7 ± 5.7 <i>vs.</i> 22.8 ± 4.8     | 0.473  |
| <hr/>                                                           |                                      |        |                                      |        |
| <i>Treatment-associated factors</i>                             |                                      |        |                                      |        |
| <b>CCRT Regimen</b>                                             |                                      |        |                                      |        |
| RT dose (Gy)                                                    | 64.5 ± 2.8 <i>vs.</i> 62.1 ± 1.1     | 0.035* | 69.7 ± 3.1 <i>vs.</i> 69.9 ± 3.2     | 0.806  |
| RT fractions                                                    | 32.0 ± 1.5 <i>vs.</i> 31.7 ± 2.7     | 0.608  | 33.6 ± 1.4 <i>vs.</i> 33.4 ± 1.5     | 0.618  |
| RT duration (days)                                              | 48.5 ± 4.8 <i>vs.</i> 48.3 ± 5.5     | 0.875  | 51.3 ± 9.7 <i>vs.</i> 51.8 ± 7.0     | 0.832  |
| Cisplatin dose (mg/m <sup>2</sup> )                             | 238.7 ± 19.4 <i>vs.</i> 236.7 ± 32.0 | 0.823  | 233.3 ± 10.1 <i>vs.</i> 200.5 ± 10.5 | 0.029* |
| <b>CCRT-induced grade 3/4 toxicity</b>                          |                                      |        |                                      |        |
| Dermatitis (no <i>vs.</i> yes)                                  | 60 : 3 <i>vs.</i> 6 : 0              | 0.585  | 20 : 1 <i>vs.</i> 32 : 1             | 0.743  |
| Pharyngitis (no <i>vs.</i> yes)                                 | 60 : 3 <i>vs.</i> 4 : 2              | 0.010* | 17 : 4 <i>vs.</i> 27 : 6             | 0.936  |
| Infection (no <i>vs.</i> yes)                                   | 55 : 8 <i>vs.</i> 4 : 2              | 0.170  | 17 : 4 <i>vs.</i> 20 : 13            | 0.113  |



|                                  |                      |               |                      |               |
|----------------------------------|----------------------|---------------|----------------------|---------------|
| Mucositis (no vs. yes)           | 49 : 14 vs. 3 : 3    | 0.131         | 18 : 3 vs. 22 : 11   | 0.119         |
| Emesis (no vs. yes)              | 57 : 6 vs. 6 : 0     | 0.429         | 20 : 1 vs. 30 : 3    | 0.554         |
| Anemia (no vs. yes)              | 58 : 5 vs. 6 : 0     | 0.474         | 18 : 3 vs. 29 : 4    | 0.813         |
| Neutropenia (no vs. yes)         | 42 : 21 vs. 4 : 2    | 1.000         | 10 : 11 vs. 23 : 10  | 0.105         |
| Thrombocytopenia (no vs. yes)    | 59 : 4 vs. 6 : 0     | 0.525         | 18 : 3 vs. 29 : 4    | 0.813         |
| <b>2-year mortality rate (%)</b> | <b>39.7 vs. 83.3</b> | <b>0.012*</b> | <b>14.3 vs. 39.4</b> | <b>0.042*</b> |

\*The *P*-value was determined using the Chi-square test (for sex, TNM stage, T status, N status, histological grade, ECOG performance status, HN-CCI, PG-SGA smoking, alcohol, betel nut, tracheostomy, percentage of feeding tube placement, mean daily calorie intake during CCRT  $\geq 30$  kcal/kg/day **30** and all CCRT-induced grade 3/4 toxicities), independent *t*-test (age, RT dose, RT fraction, RT days, cisplatin dose, BMI, BW, Hb, WBC, platelet, TLC, albumin, CRP, NLR, PLR, PNI, and 2-year mortality rate), or Mann–Whitney tests (mean daily calorie intake, mean daily protein intake, mean days of feeding tube placement, all DXA-related parameters, and all treatment-interval changes in anthropometric data and blood NIB data). Statistical significance was set at  $P < 0.05$ .

**\*\* $\Delta$**  indicates the value obtained by subtracting the pretreatment value from the post-treatment value. % indicates ( $\Delta$  value/pretreatment value)  $\times 100\%$

Abbreviations: LAHNSCC, locally advanced head and neck squamous cell carcinoma; OCC, oral cavity cancer; NOCC, non-oral cavity cancer; CCRT, concurrent chemoradiotherapy; SD, standard deviation; MD, moderately differentiated; PD, poorly differentiated; HN-CCI, Charlson comorbidity index; ECOG, Eastern Cooperative Oncology Group; PG-SGA, Patient-Generated Subjective Global Assessment; BW, body weight; BMI, body mass index; Hb, hemoglobin; WBC, white blood cell; TLC, total lymphocyte count; CRP, C-reactive protein; NLR, neutrophil-to-lymphocyte ratio; PLR, platelet-to-lymphocyte ratio; PNI, prognostic nutritional index; DXA, dual-energy X-ray absorptiometry; LBM, lean body mass; TFM, total fat mass; ASM, appendicular skeletal mass.

**Table S4.** Baseline characteristics of 123 patients with LAHNSCC in the complete CCRT subgroup and 42 incomplete CCRT/data collection subgroup undergoing CCRT stratified by tumor locations and CCRT settings

| Variables, expressed as<br>Numbers (%) or mean±SD | OCC with adjuvant CCRT            |                                 |                 | NOCC with primary CCRT            |                                 |                 |
|---------------------------------------------------|-----------------------------------|---------------------------------|-----------------|-----------------------------------|---------------------------------|-----------------|
|                                                   | CCRT completion                   |                                 | <i>P</i> -value | CCRT completion                   |                                 | <i>P</i> -value |
|                                                   | Yes                               | No                              |                 | Yes                               | No                              |                 |
| <i>Patient number</i>                             | 69 (78.4)                         | 19 (21.6)                       |                 | 54 (70.1)                         | 23 (29.9)                       |                 |
| <i>Clinicopathological characteristics</i>        |                                   |                                 |                 |                                   |                                 |                 |
| Age (years)                                       | 53.2 ± 8.4                        | 53.5 ± 7.8                      | 0.873           | 55.3 ± 8.5                        | 57.5 ± 8.3                      | 0.295           |
| Sex (male : female)                               | 68 (98.6) : 1 (1.4)               | 19 (100.0) : 0 (0.0)            | 0.598           | 51 (94.4) : 3 (5.6)               | 22 (95.7) : 1 (4.3)             | 0.827           |
| Tumor location (OCC/NOCC)                         |                                   |                                 | 0.559           |                                   |                                 | 0.309           |
| Buccal mucosa/Tonsil                              | 20 (29.0)                         | 5 (26.3)                        |                 | 13 (24.1)                         | 2 (8.7)                         |                 |
| Tongue/Tongue base                                | 28 (40.6)                         | 5 (26.3)                        |                 | 6 (11.1)                          | 4 (17.4)                        |                 |
| Gingiva/Soft palate                               | 13 (18.9)                         | 4 (21.1)                        |                 | 3 (5.6)                           | 2 (8.7)                         |                 |
| Mouth floor/Hypopharynx                           | 3 (4.3)                           | 2 (10.4)                        |                 | 24 (44.4)                         | 9 (39.1)                        |                 |
| Retromolar/Larynx                                 | 2 (2.9)                           | 1 (5.3)                         |                 | 8 (14.8)                          | 6 (26.1)                        |                 |
| Lip                                               | 2 (2.9)                           | 1 (5.3)                         |                 | ---                               | ---                             |                 |
| Hard palate                                       | 1 (1.4)                           | 1 (5.3)                         |                 | --                                | --                              |                 |
| TNM stage (III vs. IVA vs. IVB)                   | 4(5.8):50(72.5):15(21.7)          | 1(5.3):12(63.2):6(31.5)         | 0.672           | 5(9.3):35(64.8):14(25.9)          | 6(26.1):12(52.2):5(201.7)       | 0.155           |
| T status (T0-2 vs. T3-4)                          | 8 (11.6) : 61(88.4)               | 4 (21.1) : 15 (78.9)            | 0.287           | 20 (37.0) : 34 (63.0)             | 7 (30.4) : 16 (69.6)            | 0.578           |
| N status (N0-1 vs. N2-3)                          | 30 (43.5) : 39 (56.5)             | 11 (57.9) : 8 (42.1)            | 0.265           | 11 (20.4) : 43 (79.6)             | 6 (26.1) : 17 (73.9)            | 0.58            |
| ECOG performance status (0 : 1 : 2)               | 2(2.9):61(86.4):6(8.6)            | 1(5.3):16(84.2):2(10.5)         | 0.552           | 6(11.1):47(87.0):1(1.9)           | 2(8.7):19(82.6):2(8.7)          | 0.413           |
| Histological grade (1 : 2 : 3)                    | 8(11.6):51(73.9):10(14.5)         | 3(15.8):14(73.7):2(10.5)        | 0.826           | 2(3.7):34(63.0):18(33.3)          | 1 (4.3):15(65.2):7(30.4)        | 0.967           |
| Smoking (no : yes)                                | 6 (8.7) : 63 (91.3)               | 3 (15.8) : 16 (84.2)            | 0.366           | 5 (9.3) : 49 (90.7)               | 0 (0.0) : 23 (100.0)            | 0.131           |
| Alcohol (no : yes)                                | 18 (26.1) : 51 (73.9)             | 7 (36.8) : 12 (63.2)            | 0.357           | 13 (24.1) : 41 (75.9)             | 4 (17.4) : 19 (82.6)            | 0.518           |
| Betel nut (no : yes)                              | 16 (23.2) : 53 (76.8)             | 6 (31.6) : 13 (68.4)            | 0.455           | 27 (50.0) : 27 (50.0)             | 12 (52.2) : 11 (47.8)           | 0.861           |
| HN-CCI (0 vs. 1 vs. 2 vs. ≥3)                     | 29(42.1):15(21.7):6(8.7):19(27.5) | 13(68.4):3(15.8):3(15.8):0(0.0) | 0.115           | 22(40.7):17(31.5):6(11.1):9(16.7) | 15(65.2):4(17.4):4(17.4):0(0.0) | 0.075           |
| Tracheostomy (no : yes)                           | 23 (33.3) : 46 (66.7)             | 10 (52.6) : 9 (47.4)            | 0.124           | 44 (81.5) : 10 (18.5)             | 17 (73.9) : 6 (26.1)            | 0.454           |

**Nutritional and inflammatory markers before CCRT**

|                                                          |                            |                         |        |                           |                             |          |
|----------------------------------------------------------|----------------------------|-------------------------|--------|---------------------------|-----------------------------|----------|
| BW (kg)                                                  | 63.6 ± 12.6                | 61.4 ± 10.1             | 0.026* | 62.1 ± 12.1               | 66.8 ± 12.9                 | 0.199    |
| BMI (kg/m <sup>2</sup> )                                 | 22.7 ± 4.3                 | 22.6 ± 3.6              | 0.525  | 22.7 ± 4.0                | 24.8 ± 5.5                  | 0.113    |
| Hb (g/dL)                                                | 11.7 ± 1.5                 | 12.1 ± 2.6              | 0.400  | 11.9 ± 1.7                | 11.2 ± 2.2                  | 0.150    |
| WBC (×10 <sup>3</sup> cells/mm <sup>3</sup> )            | 7.3 ± 2.5                  | 8.7 ± 2.8               | 0.062  | 7.1 ± 2.9                 | 7.4 ± 2.8                   | 0.716    |
| Platelet count (×10 <sup>3</sup> /mm <sup>3</sup> )      | 341.1 ± 148.4              | 274.5 ± 187.1           | 0.066  | 251.4 ± 75.3              | 265.5 ± 86.8                | 0.473    |
| TLC (×10 <sup>3</sup> cells/mm <sup>3</sup> )            | 1.6 ± 0.6                  | 1.8 ± 0.5               | 0.240  | 1.8 ± 0.7                 | 1.9 ± 0.6                   | 0.283    |
| Albumin (g/dL)                                           | 3.8 ± 0.6                  | 3.9 ± 0.7               | 0.488  | 3.8 ± 0.5                 | 3.9 ± 0.5                   | 0.427    |
| CRP (mg/dL)                                              | 11.2 ± 1.8                 | 7.9 ± 7.2               | 0.431  | 18.7 ± 6.6                | 8.7 ± 15.3                  | 0.398    |
| <b>PG-SGA (well vs. moderate vs. severe) before CCRT</b> | 13(18.8):38(55.1):18(26.1) | 12(63.2):6(31.6):1(5.3) | 0.001* | 5 (9.3):33(61.1):16(29.6) | 18 (78.3): 5 (21.7): 0(0.0) | < 0.001* |
| <b>Body composition parameters before CCRT</b>           |                            |                         |        |                           |                             |          |
| LBM (kg)                                                 | 43.8 ± 5.1                 | 44.4 ± 8.6              | 0.662  | 43.6 ± 6.8                | 45.6 ± 6.8                  | 0.249    |
| TFM (kg)                                                 | 17.0 ± 8.8                 | 16.4 ± 6.5              | 0.769  | 15.9 ± 6.0                | 15.4 ± 8.1                  | 0.754    |
| ASM (kg)                                                 | 18.4 ± 3.0                 | 18.9 ± 2.7              | 0.535  | 18.7 ± 3.6                | 19.2 ± 3.9                  | 0.603    |

\*indicates a significant *P*-value < 0.05. The analytical methods corresponding to data shown in Table S2 are identical to those in Table 3

Abbreviations: LAHNSCC, locally advanced head and neck squamous cell carcinoma; CCRT, concurrent chemoradiotherapy; OCC, oral cavity cancer; NOCC, non-oral cavity cancer; TNM, tumor node metastasis; ECOG, Eastern Collaboration Oncology Group; HN-CCI, head and neck Charlson Comorbidity Index; RT, radiotherapy; PG-SGA, Patient-Generated Subjective Global Assessment; BMI, body mass index; BW, body weight; Hb, hemoglobin; WBC, white blood cell count; TLC, total lymphocyte count; CRP, C-reactive protein; LBM, lean body mass; TFM, total fat mass; ASM, appendicular skeletal muscle mass; BMC, bone mineral content.

Independent *t*-tests were used for age, BW, BMI, Hb, TLC, and albumin levels. The Mann–Whitney test was used for WBC, platelet count, CRP, and all body composition parameters. The chi-square test was used for all categorical data.
